# Supplementary material for: Carbon and graphene double protection strategy to improve the SnOx electrode performance anodes for lithium-ion batteries
Source: Royal Society of Chemistry journal article supplement (doi:10.1039/c3nr00467h), 2013-01-01
Supplement: c3nr00467h.pdf [file c3nr00467h.pdf]

## **Supplementary Information**

### **Carbon and graphene double protection strategy to improve the SnO<sub>x</sub> electrode performance anodes for lithium-ion batteries**

Jian Zhu, Danni Lei, Guanhua Zhang, Bingan Lu\* and Taihong Wang\*

Key Laboratory for Micro-Nano Optoelectronic Devices of Ministry of  
Education, State Key Laboratory for Chemo/Biosensing and  
Chemometrics, Hunan University, Hunan, P.R. China.

**Figure S1**

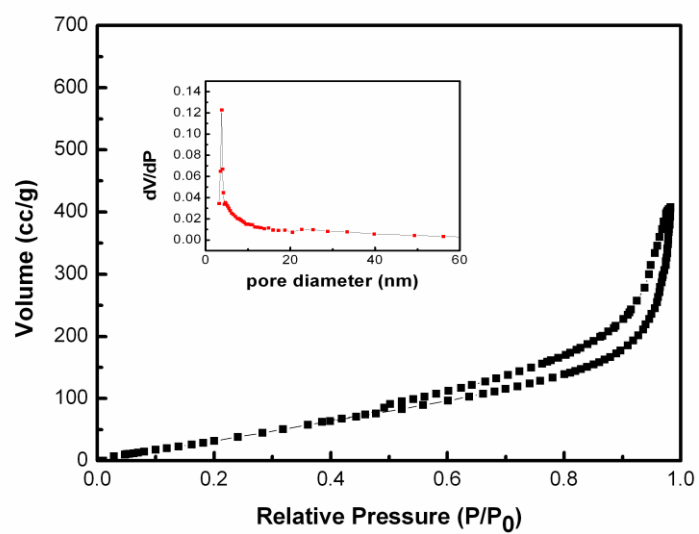

**Figure S1.** Nitrogen adsorption/desorption isotherms and the corresponding BJH distributions (inset) of the SnO<sub>x</sub>@C@G composite. The average pore diameter of the sample is about 3.8 nm, determined by the BJH method.

**Figure S2**

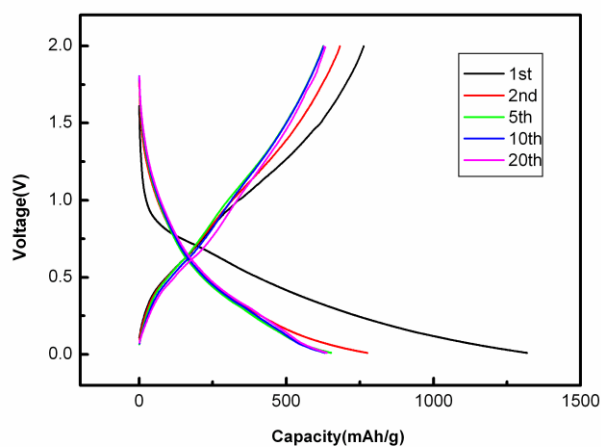

**Figure S2.** Charge and discharge curves of SnO<sub>x</sub>@C@G composite obtained at the 1<sup>st</sup>, 2<sup>nd</sup>, 5<sup>th</sup>, 10<sup>th</sup>, 20<sup>th</sup> cycles at the current density of 70 mA g<sup>-1</sup>.

**Figure S3**

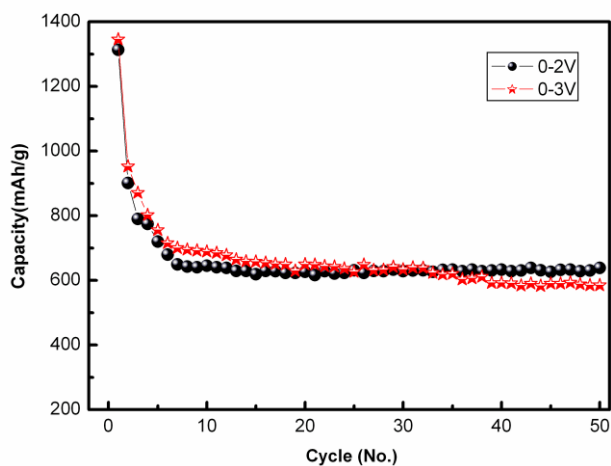

**Figure S3.** The cycling performances of SnO<sub>x</sub>@C@G composite cycled between a voltage of 0.01-2 V and 0.01-3 V at the current density of 70 mA g<sup>-1</sup>.

Fig S2 shows the charge and discharge profiles of the SnO<sub>x</sub>@C@G composite with a voltage range of 0.01–2 V. It exhibits large first discharge and charge capacities of about 1313.1 and 849.8 mAh g<sup>-1</sup>, corresponding to a Coulombic efficiency of about 64.7%. The cycling properties of SnO<sub>x</sub>@C@G composite in the potential range of 0.01-2 V and 0.01-3 V are shown in Fig S3, the reversible capacity is about 630.8 mAh g<sup>-1</sup> after 50 cycles. Compared with voltage range of 0.01-3 V, SnO<sub>x</sub>@C@G composite with a voltage range of 0.01–2 V has lower first discharge capacity but better Cycle stability.

**Figure S4**

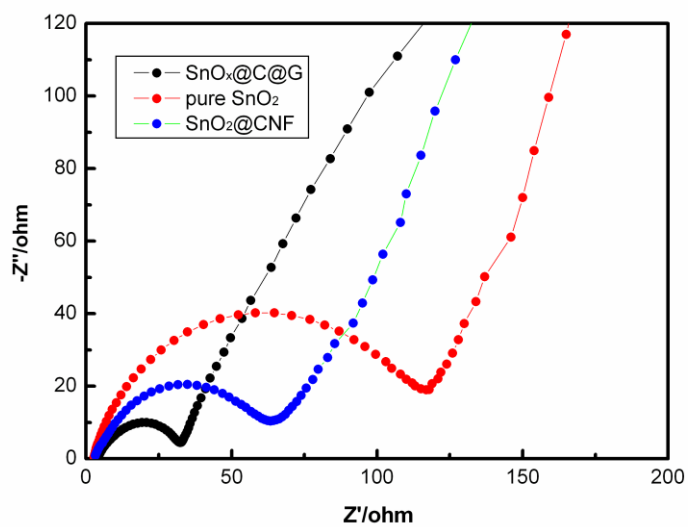

**Figure S4** Electrochemical impedance spectra (EIS) for the cells of pure  $\text{SnO}_2$  (red),  $\text{SnO}_x\text{@CNF}$  (blue) and  $\text{SnO}_x\text{@C@G}$  composite (black).
